# Supplementary material
Source: MDPI journal article supplement (https://www.mdpi.com/2071-1050/14/20/13180)
Supplement: s1 [file s1]

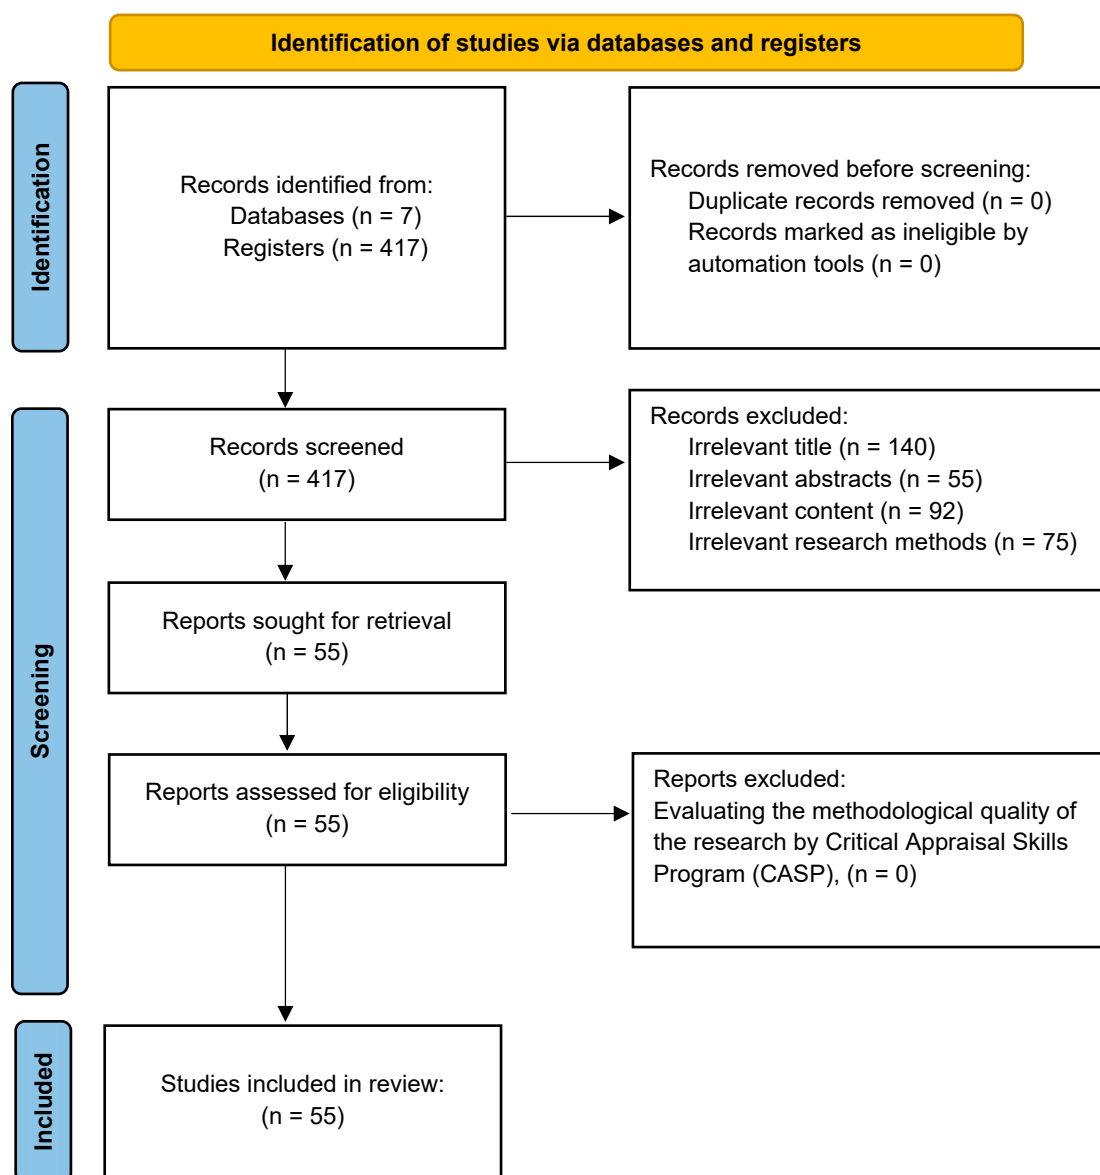

**Figure S1.** PRISMA 2020 flow diagram for systematic reviews which included searches of databases and registers
